# Supplementary material
Source: publisher figshare collection journal article supplement (https://acs.figshare.com/ndownloader/files/5754963)

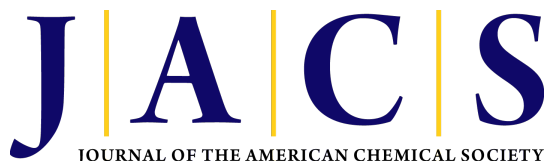

JOURNAL OF THE AMERICAN CHEMICAL SOCIETY

J. Am. Chem. Soc., 1997, 119(33), 7869-7870, DOI:[10.1021/ja9707670](https://doi.org/10.1021/ja9707670)

#### Terms & Conditions

Electronic Supporting Information files are available without a subscription to ACS Web Editions. The American Chemical Society holds a copyright ownership interest in any copyrightable Supporting Information. Files available from the ACS website may be downloaded for personal use only. Users are not otherwise permitted to reproduce, republish, redistribute, or sell any Supporting Information from the ACS website, either in whole or in part, in either machine-readable form or any other form without permission from the American Chemical Society. For permission to reproduce, republish and redistribute this material, requesters must process their own requests via the RightsLink permission system. Information about how to use the RightsLink permission system can be found at <http://pubs.acs.org/page/copyright/permissions.html>

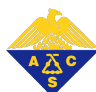

ACS Publications

MOST TRUSTED. MOST CITED. MOST READ.

Copyright © 1997 American Chemical Society

# Solvothermal Co-Reduction Route to Nanocrystalline

## III-V Semiconductor InAs

### Supporting Information:

Fig.1 XRD pattern of the sample prepared at 300 °C shows a perfectly crystallized sample with average size about 15nm.(Calculated by Scherer Formula)

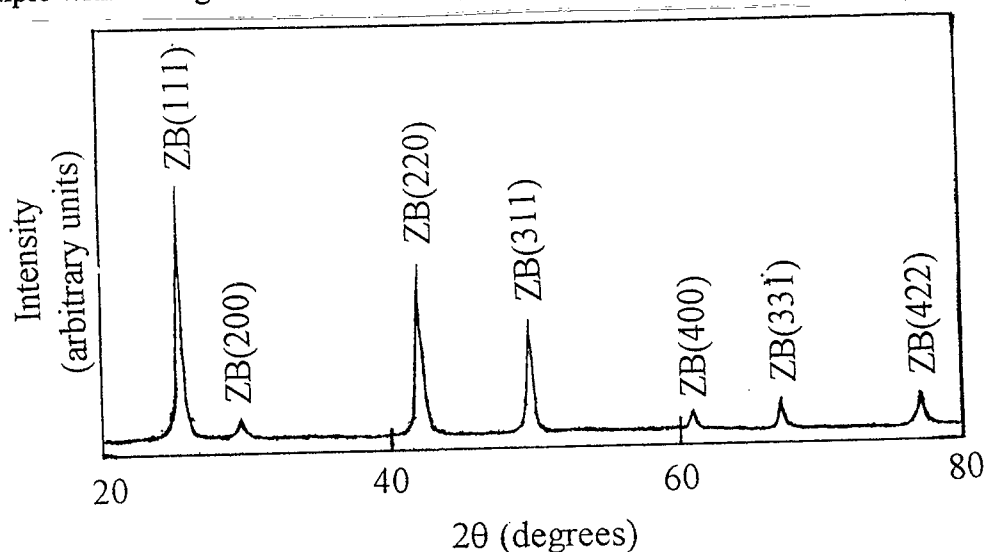

Fig. 2 TEM image and Electron Diffraction Pattern of the sample prepared at 300 °C. In the TEM image, the particles can be clearly distinguished from each other, with uniform sizes of 15nm or so. The Electron Diffraction pattern shows a well crystallized polycrystalline sample.

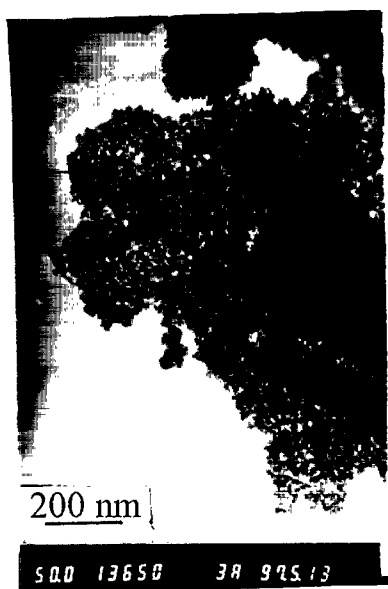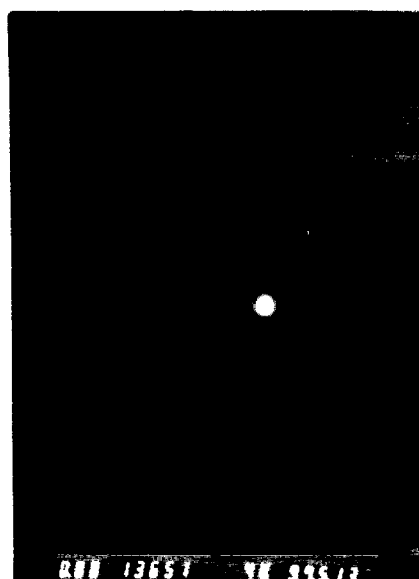

Supplement: Supplementary file 1 [file 5754963]
